# Supplementary material for: Facile synthesis of boron- and nitride-doped MoS2 nanosheets as fluorescent probes for the ultrafast, sensitive, and label-free detection of Hg2+
Source: Royal Society of Chemistry journal article supplement (doi:10.1039/c5an00641d), 2015-01-01
Supplement: c5an00641d1.pdf [file c5an00641d1.pdf]

## Supporting Information

### Facile Synthesis of Boron and Nitride Doped MoS<sub>2</sub> Nanosheets as Fluorescence Probes for Ultrafast, Sensitive, and Label-free Detection of Hg<sup>2+</sup>

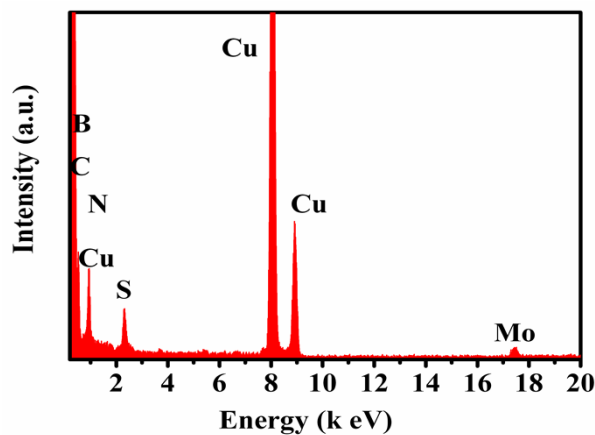

Fig. S1 EDS of B,N-MoS<sub>2</sub>.

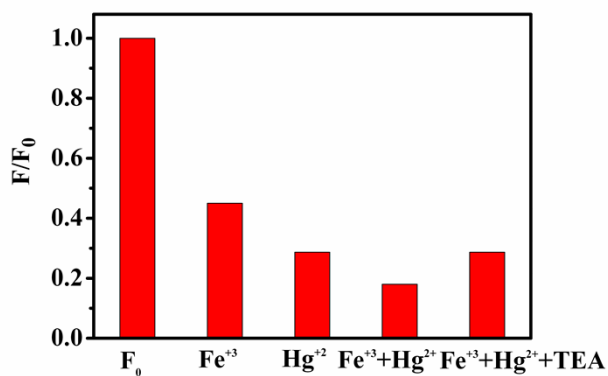

Fig. S2 PL intensities of B,N-MoS<sub>2</sub> dispersion under various conditions in aqueous solution (excitation at 280 nm; [Fe<sup>3+</sup>] = 25 μM; [Hg<sup>2+</sup>] = 2 μM, [TEA] = 1000 μM).

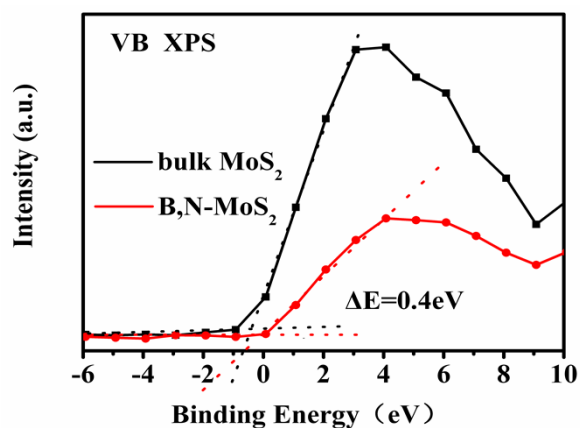

Fig. S3 VB XPS analysis of B,N-MoS<sub>2</sub>.
